# Supplementary material for: Correlating the mechanical and surface properties with the composition of triblock copoly(2-oxazoline)s
Source: Royal Society of Chemistry journal article supplement (doi:10.1039/b814587c), 2008-11-12
Supplement: b814587c.pdf [file b814587c.pdf]

Electronic Supplementary Information for Paper B814587C:  
J. M. Kranenburg *et al.*  
“Correlating the Mechanical and Surface Properties with the  
Composition of Triblock Copoly(2-oxazoline)s”

Depth-sensing indentation experiments were conducted on the polymer films. The obtained load-displacement responses were analyzed using the method proposed by Oliver and Pharr (W. C. Oliver and G. M. Pharr, *J. Mater. Res.* 1992, 7, 1564-1583). In this method, the elastic behavior of the material is determined from the load-displacement response upon unloading the material.

The thus obtained moduli (averages from multiple indentation experiments) are shown in Fig. 1, 2, 3 and 4 in the article. Load-displacement responses of the materials discussed in Fig 1c are shown here. The Phe / Non combination is chosen, as for this system both the ABA and the BAB triblock were analyzed.

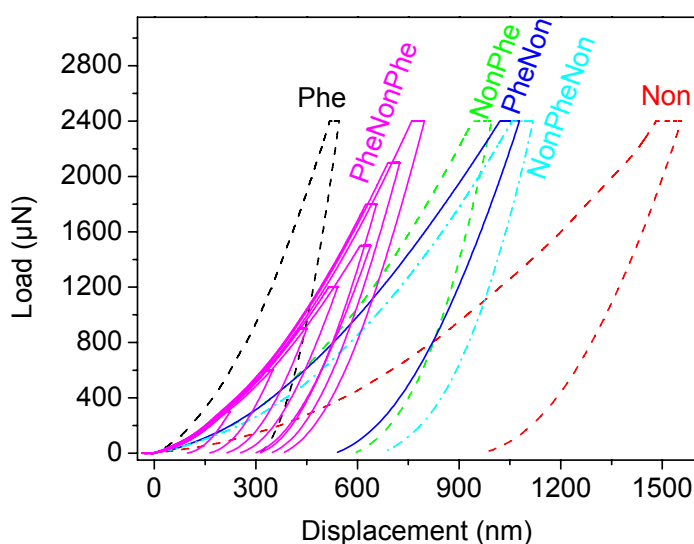

**Fig. A:** Some of the Load-displacement responses that were analyzed to obtain the  $E_r$  shown in Figure 1c.

As described in the Experimental section, indentation experiments were conducted at several maximum load levels, the presented data in Fig. 1, 2, 3 and 4 being averages of the experiment conducted at various maximum loads on the same material. In order to visualize this, for PheNonPhe, several load-displacement responses are shown in Fig. A.
